# Supplementary material for: Controlled synthesis of pure Au25(2-Nap)18 and Au36(2-Nap)24 nanoclusters from 2-(diphenylphosphino)pyridine protected Au nanoclusters
Source: Royal Society of Chemistry journal article supplement (doi:10.1039/c6ra22216a), 2016-01-01
Supplement: c6ra22216a1.pdf [file c6ra22216a1.pdf]

# Controlled synthesis of pure $\text{Au}_{25}(\text{2-Nap})_{18}$ and $\text{Au}_{36}(\text{2-Nap})_{24}$ nanoclusters from 2-(Diphenylphosphino)pyridine protected Au nanoclusters

Yifei Zhang,<sup>a,b</sup> Chao Liu,<sup>b</sup> Xiujuan Yang,<sup>b</sup> Ming Bao,<sup>\*a</sup> Jiahui Huang,<sup>\*b</sup> Wenjie Shen<sup>b</sup>

<sup>a</sup> State Key Laboratory of Fine Chemicals, Dalian University of Technology, No.2 Linggong Road, Dalian, 116024, China. E-mail: mingbao@dlut.edu.cn; Tel.: +86-411-8498-6180;

<sup>b</sup> Gold Catalysis Research Center, State Key Laboratory of Catalysis, Dalian Institute of Chemical Physics, Chinese Academy of Sciences, 457 Zhongshan Road, Dalian 116023, China. E-mail: jiahuihuang@dicp.ac.cn; Tel: +86-411-8246-3012.

## Experimental

### Chemical

All the chemicals were used as received without further purification. Tetrachloroauric acid ( $\text{HAuCl}_4 \cdot 4\text{H}_2\text{O}$ , 99%) was purchased from Acros (Belgium). 2-Naphthalenethiol (2-Nap, 99%), 2-(diphenylphosphino)pyridine ( $\text{PPh}_2\text{Py}$ , 98%) and triphenylphosphine ( $\text{PPh}_3$ , 98%) were purchased from Adamas (Switzerland). Sodium borohydride ( $\text{NaBH}_4$ , 99%, Sinopharm), dichloromethane (DCM, 99%), toluene (99%), methanol (99%), 1-hexane (99%) and ethanol (99%) were purchased from Sinopharm Chemical Reagent Co., Ltd. (China). The structures of ligands were shown in Figure S4.

### Preparation of phosphine protected Au nanoclusters as precursors

$[\text{Au}(\text{PPh}_2\text{py})\text{Cl}]$  and  $[\text{Au}(\text{PPh}_3)\text{Cl}]$  complex were obtained at room temperature via reacting  $\text{HAuCl}_4$  with  $\text{PPh}_2\text{Py}$  or  $\text{PPh}_3$  in 20 mL acetone. The  $[\text{Au}(\text{PPh}_2\text{Py})\text{Cl}]$  or  $[\text{Au}(\text{PPh}_3)\text{Cl}]$  was dissolved in acetone and stirred for 15 min in flask. And then,  $\text{NaBH}_4$  dissolved in ethanol was added into the reaction solution and stirred for 1 day. After that, the product was washed with hexane four times. At last, the product was extracted with DCM twice, and used as the precursors for further etching treatment.

### Synthesis of $\text{Au}_{25}(\text{2-Nap})_{18}$ nanoclusters

$\text{Au}_{25}(\text{2-Nap})_{18}$  nanoclusters were obtained by heating the Au nanoclusters precursors at high temperature with excess thiols. In details, Au nanoclusters precursors were dissolved in 2 mL DCM and 20 mL toluene. 2-naphthalenethiol (220 mg) was added to solution and vigorously stirred. The solution was heated at 80 °C for 1 day. When the reaction was finished, the solution was dried and washed with methanol four times. To obtain high-purity product, the crude product was extracted with DCM two times. The purified product was collected by evaporating DCM.

### Synthesis of $\text{Au}_{36}(\text{2-Nap})_{24}$ nanoclusters

The synthetic procedure of  $\text{Au}_{36}(\text{2-Nap})_{24}$  is similar to that of  $\text{Au}_{25}(\text{2-Nap})_{18}$ . The Au nanoclusters precursors were dissolved in 2 mL DCM and 20 mL toluene. 200 mg 2-naphthalenethiol was added to reaction solution. The solution was heated at 50 °C and vigorously stirred. After 1 day, the black solution was formed and dried with vacuum rotary evaporator at 40 °C. The crude product was washed with methanol and extracted with DCM two times. Finally, the purified product was collected by evaporating DCM at vacuum condition.

### **Characterization**

Matrix-assisted laser desorption ionization mass spectrometry (MALDI-MS) was measured on (MALDI-TOF/TOF 5800) using *trans*-2-[3-(4-*tert*-butylphenyl)-2-methyl-2-propenyldiene] malononitrile (DCTB) as the matrix. 0.5 mg matrix and 0.1 mg Au nanoclusters were dissolved in DCM, respectively, and mixed together. UV-Vis spectra of Au nanoclusters were collected on a Cary 100. 0.2 mg of Au nanoclusters were dissolved in 2 mL DCM.

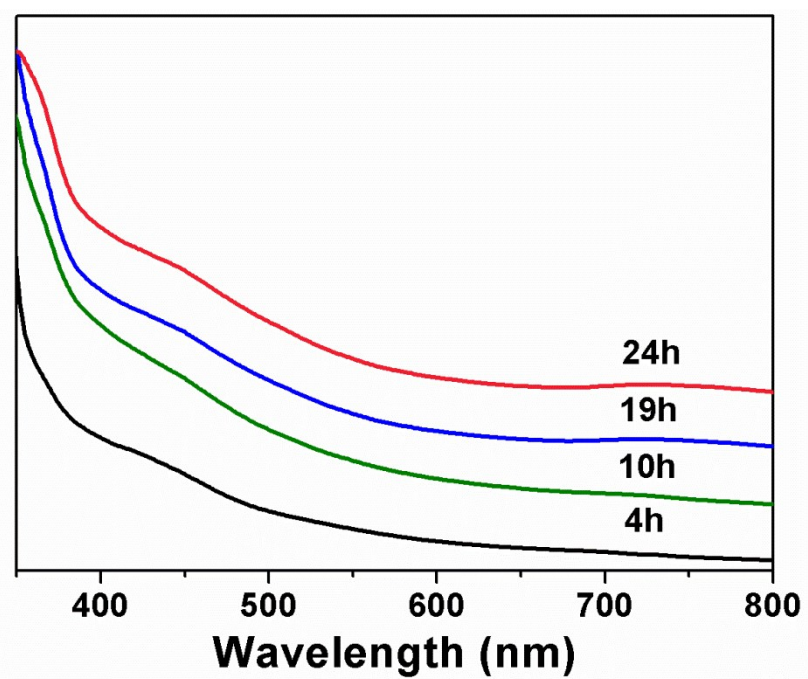

**Figure S1** The time-dependent UV-Vis absorption spectra of PPh<sub>2</sub>Py protected Au nanoclusters during the etching process at 60 °C.

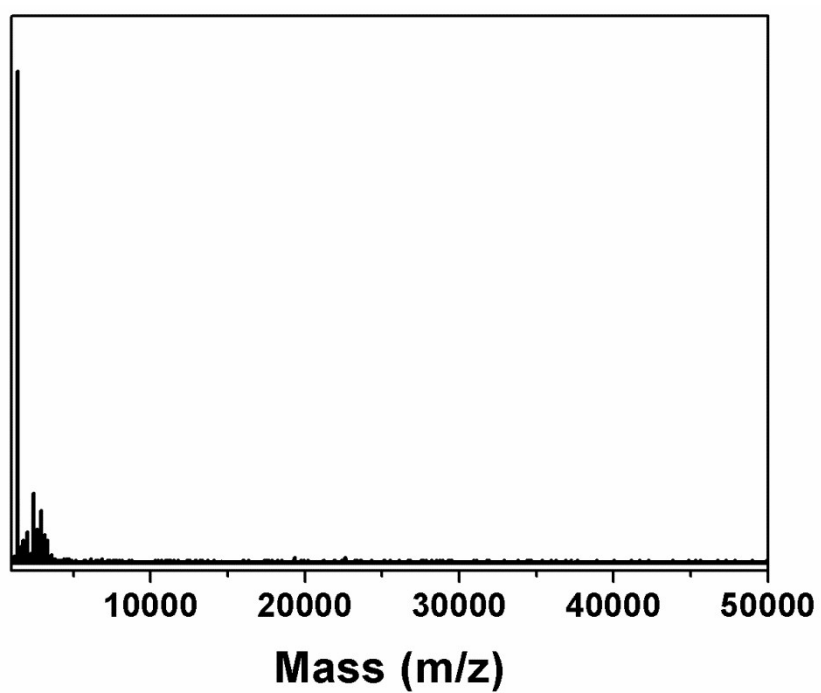

**Figure S2** The MALDI-mass spectrometry of  $\text{PPh}_3$  protected polydispersed Au nanoclusters.

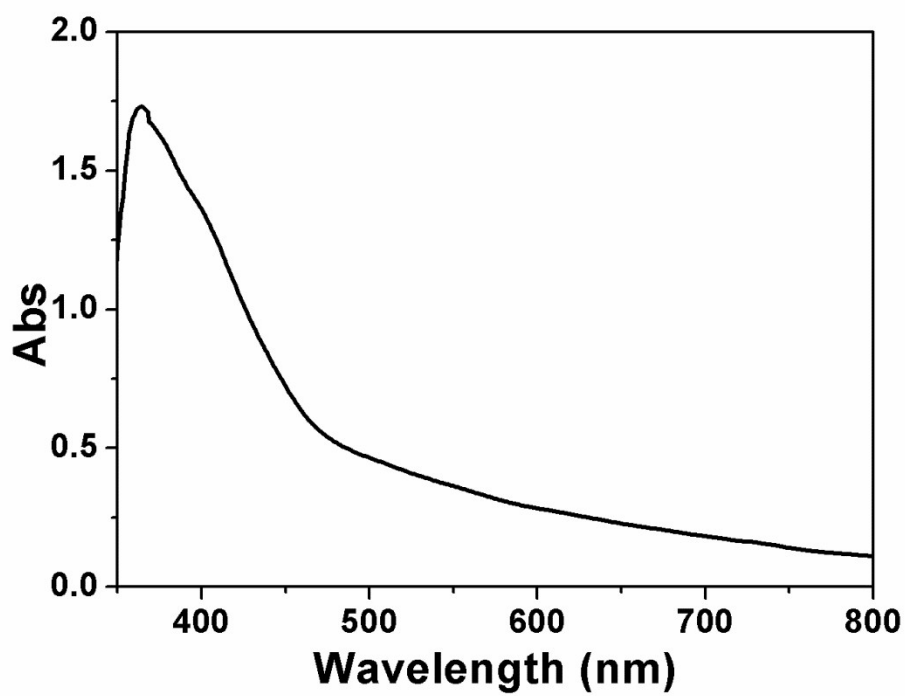

**Figure S3** The UV-Vis spectrum of PPh<sub>3</sub> protected polydispersed Au nanoclusters.

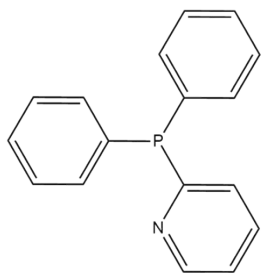

2-(diphenyl-phosphino)pyridine

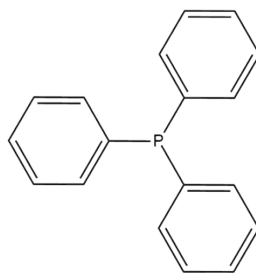

Triphenylphosphine

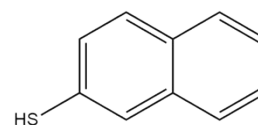

2-Naphthalenethiol

**Figure S4** The structure of ligands, 2-(diphenyl-phosphino)pyridine, triphenylphosphine and 2-Naphthalenethiol, respectively.
